# Supplementary material
Source: Springer Nature journal article supplement (http://www.springermedizin.de/resource/supplementary/12937_2014_790_MOESM3_ESM.pdf/25654072)

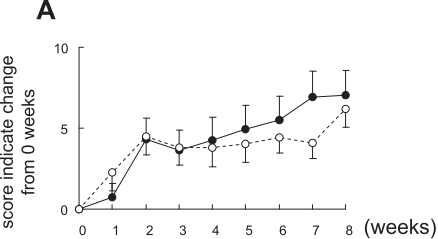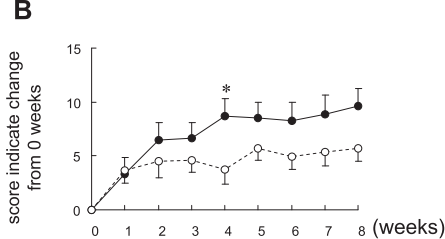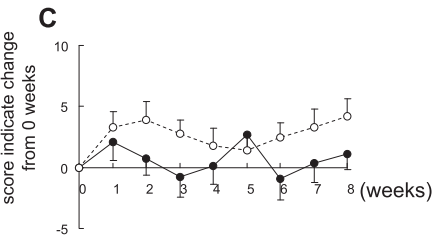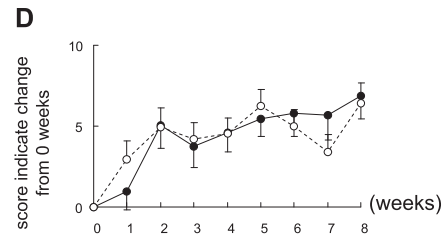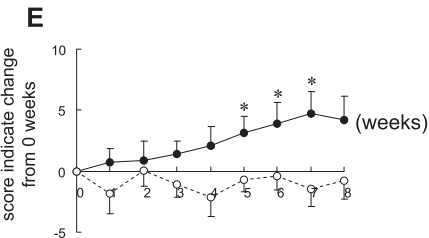

\* $p < 0.05$ , vs. placebo

Supplement: MOESM3 [file 25654072]
